# Supplementary material for: Preparation of primary amine-modified gold nanoparticles and their transfection ability into cultivated cellsElectronic Supplementary Information (ESI) available: A TEM image of the complex at a w/w ratio of 11. See http://www.rsc.org/suppdata/cc/b4/b406189f/
Source: Royal Society of Chemistry journal article supplement (doi:10.1039/b406189f), 2004-01-01

**Supplementaly Information**

**Preparation of primary amine-modified gold nanoparticles and their transfection ability into cultivated cells**

Takuro Niidome, Kanako Nakashima, Hironobu Takahashi and Yasuro Niidome

Supplement Figure S1. Transmission electron micrograph of DNA-cationic gold nanoparticles complex at a w/w ratio of 11.


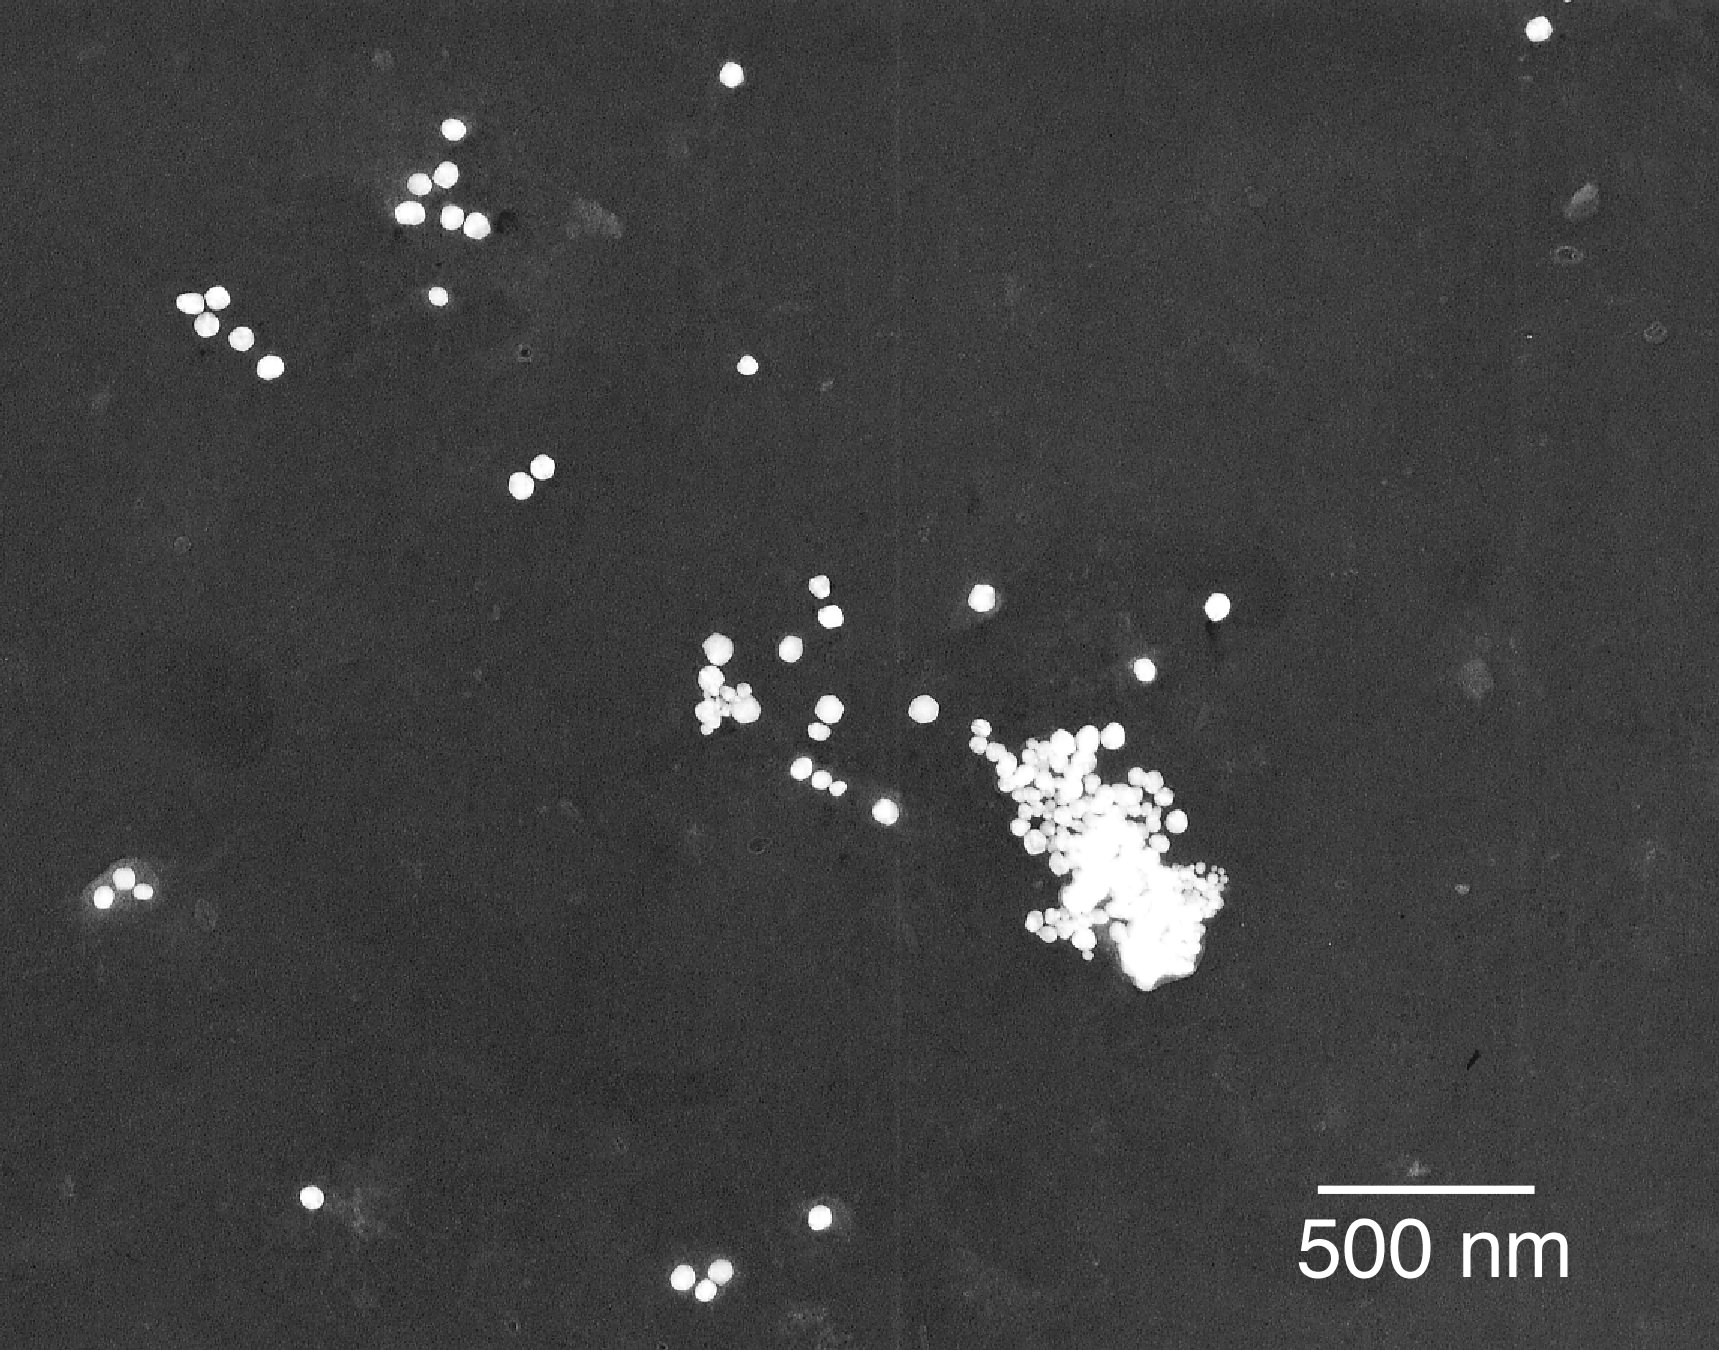

Supplement: b406189f.doc [file b406189f.doc]
